# Supplementary material for: One-pot aqueous synthesis of composition-tunable near-infrared emitting Cu-doped CdS quantum dots as fluorescence imaging probes in living cells
Source: Royal Society of Chemistry journal article supplement (doi:10.1039/c2jm33560c), 2012-01-01
Supplement: c2jm33560c.pdf [file c2jm33560c.pdf]

# Supporting Information

## **One-pot aqueous synthesis of composition-tunable near-infrared emitting Cu-doped CdS quantum dots as fluorescence imaging probes in living cells**

Fei Zhang<sup>a</sup>, Xi-Wen He<sup>a</sup>, Wen-You Li\*<sup>a</sup>, Yu-Kui Zhang<sup>a, b</sup>

<sup>a</sup> *State Key Laboratory of Medicinal Chemical Biology, and Department of Chemistry, Nankai University, Tianjin 300071, China*

<sup>b</sup> *National Chromatographic Research and Analysis Center, Dalian Institute of Chemical Physics, Chinese Academy of Sciences, Dalian 116011, China*

\* To whom correspondence should be addressed. E-mail: [wyli@nankai.edu.cn](mailto:wyli@nankai.edu.cn)

## Supporting Figures:

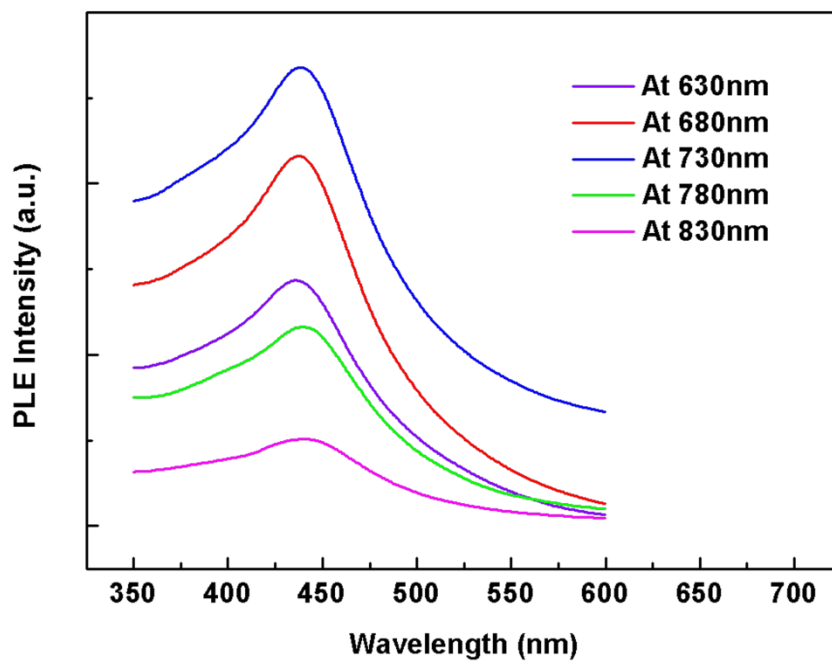

**Figure S1.** The PLE spectra of Cu:CdS d-dots at different emission wavelength.

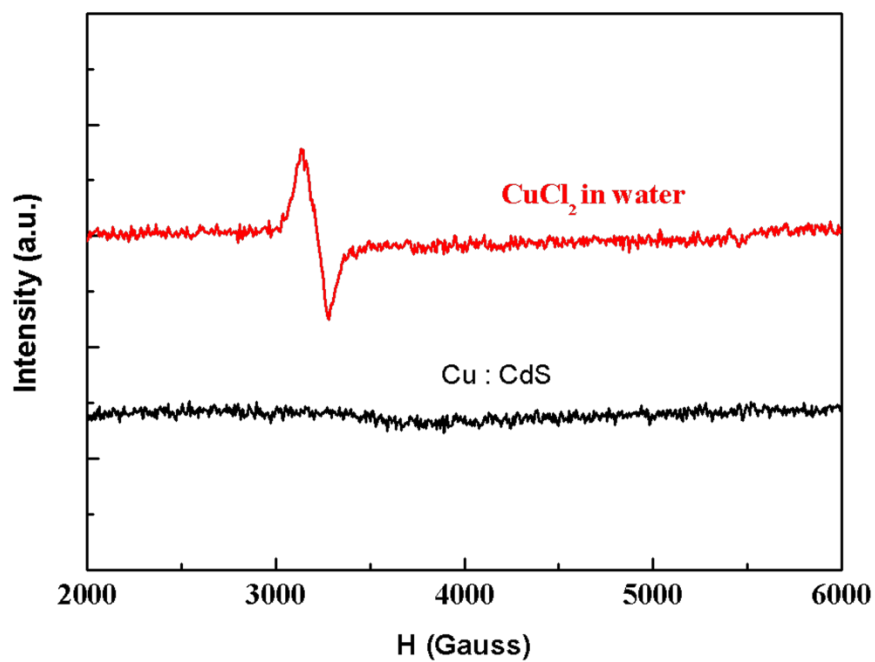

**Figure S2.** EPR spectra of Cu: CdS d-dots and CuCl<sub>2</sub> in water.

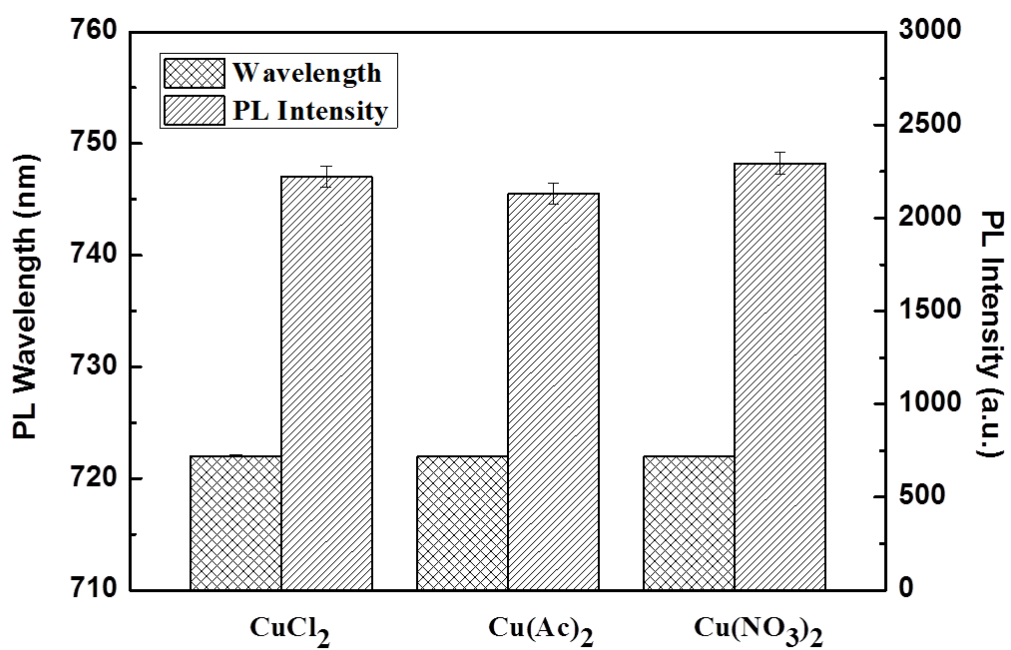

**Figure S3.** The emission wavelength and PL intensity of the d-dots doped with different Cu precursors.

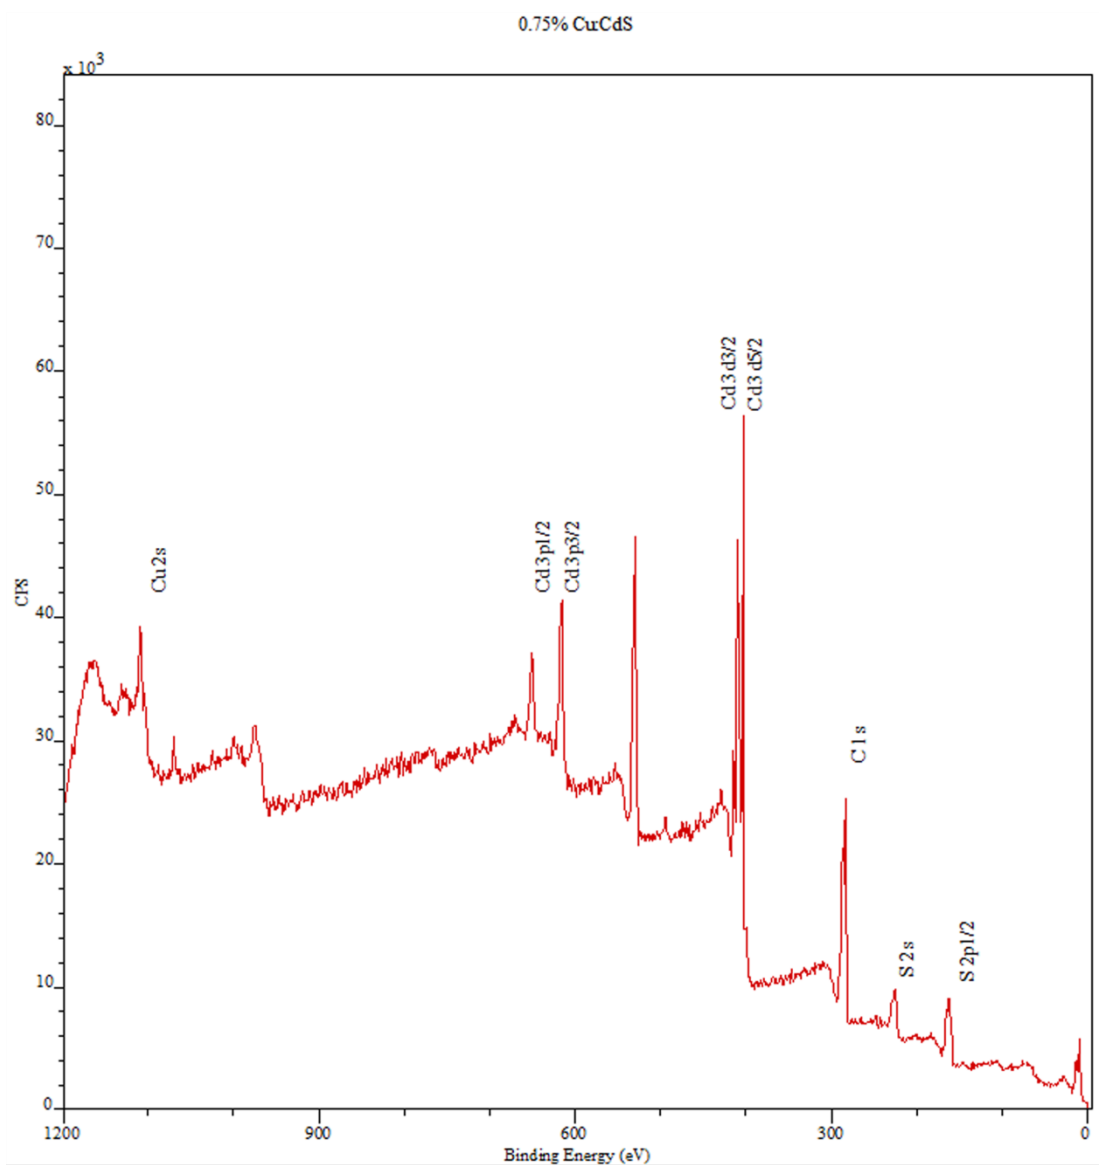

**Figure S4.** XPS spectra of Cu:CdS d-dots.

**Table S1.** The concentration of Cd and Cu element in the d-dots measured by ICP-AES spectra.

| <b>Element</b>     |        | <b>Cd</b> | <b>Cu</b> |
|--------------------|--------|-----------|-----------|
| Concentration      | (mg/L) | 109.7     | 0.40      |
| Relative magnitude | (%)    | 100       | 0.64      |
